# Supplementary material for: Biodegradable poly (lactic acid-co-glycolic acid) scaffolds as carriers for genetically-modified fibroblasts
Source: PLoS One. 2017 Apr 5;12(4):e0174860. doi: 10.1371/journal.pone.0174860 (PMC5381796; doi:10.1371/journal.pone.0174860)
Supplement: S1 Data — (XLSX) [file pone.0174860.s001.xlsx]

## Sheet: Sheet1
D1				D3					D6					D9
F_max					F_max					F_max					F_max
105.47				V	113.256				V	90.6297				V	106.8
131.183				V	108.114				V	112.74				V	100.027
111.242				V	105.167				V	109.438				V	105.829
95.1179	MW	SD		V	116.599	MW	SD		V	114.58	MW	SD		V	88.9772	MW	SD		TTEST d1vs d9
135.874	115.777	17.2831		V	141.671	116.961	14.5069		V	107.632	107.004	9.54901		V	109.667	102.26	8.21012		0.152833
99.4375				VZ	71.2485				VZ	84.1075				VZ	83.5759
126.386				VZ	112.91				VZ	112.088				VZ	95.1709
107.442				VZ	131.465				VZ	87.0725				VZ	72.8158
138.408	MW	SD	ttest	VZ	99.3101	MW	SD	ttest	VZ	93.6715	MW	SD	ttest	VZ	109.407	MW	SD	ttest
123.089	118.953	15.526	0.767696	VZ	136.76	110.339	26.4606	0.636788	VZ	87.3708	92.8621	11.2983	0.0650158	VZ	91.942	90.5823	13.6199	0.139229	0.0153113
204.157				E	226.081				E	173.536				E	108.295
195.237				E	104.941				E	159.904				E	99.8822
216.656				E	242.041				E	163.648				E	106.574
223.702	MW	SD		E	219.121	MW	SD		E	222.042	MW	SD		E	104.035	MW	SD
212.69	210.489	11.0701		E	229.821	204.401	56.2182		E	202.479	184.322	26.8908		E	134.173	110.592	13.557		1.33891e-06
224.793				EZ	231.244				EZ	161.437				EZ	110.293
199.284				EZ	226.988				EZ	180.395				EZ	125.73
194.138				EZ	231.972				EZ	195.203				EZ	121.977
216.405	MW	SD		EZ	214.623	MW	SD		EZ	206.471	MW	SD		EZ	110.025	MW	SD
239.013	214.727	18.4143	0.670855	EZ	219.743	224.914	7.53032	0.442086	EZ	188.34	186.369	16.9063	0.888962	EZ	108.329	115.271	7.98224	0.524748	3.92577e-06
